# Supplementary material for: Prognostic value of the Residual Cancer Burden index according to breast cancer subtype: Validation on a cohort of BC patients treated by neoadjuvant chemotherapy
Source: PubMed Central journal article supplement (PMC7313974; doi:10.1371/journal.pone.0234191), 2020-06-24
Supplement: pone.0234191.s001.pdf [file pone.0234191.s001.pdf]

## SUPPLEMENTAL MATERIAL AND TABLES

### Supplementary Material:

#### *Pathological review:*

##### *Residual Cancer Burden*

To enable the calculation of RCB score, the following variables were retrieved: diameter of the primary tumor bed in the resection specimen ( $d_{\text{prim}}$ ), the proportion of the primary tumor bed that contains invasive carcinoma ( $f_{\text{inv}}$ ), the number of axillary lymph nodes containing metastatic carcinoma (LN), and the diameter of the largest metastasis in an axillary lymph node ( $d_{\text{met}}$ ). Largest bidimensional measurements of the residual primary tumor bed were recorded from the macroscopic description in the pathology report. If multiple tumors were present, the dimensions of the largest were considered. The proportion of invasive carcinoma ( $f_{\text{inv}}$ ) within the cross sectional area of the primary tumor bed was estimated from the overall percent area of carcinoma (%CA) and then corrected for the component of in situ carcinoma (%CIS):  $f_{\text{inv}} (1 - (\% \text{CIS}/100)) (\% \text{CA}/100)$ .

RCB was calculated with the formule:  $\text{RCB} = 1.4 (f_{\text{inv}} d_{\text{prim}})^{0.17} + [4 (1 - 0.75^{\text{LN}}) d_{\text{met}}]^{0.17}$

##### *Lymphovascular invasion*

Presence or absence of LVI was determined by unstained standard formalin-fixed paraffin-embedded examination on surgical specimen. Immunostaining with vascular markers was occasionally performed to rule out invasive carcinoma with shrinkage artifact. LVI data were extracted from pathology records by two independent researchers (TL, ASH), and were dichotomized into a binary variable (Post-NAC LVI: yes/ no). Patients whose tumor reached pCR were considered as having no LVI. Results were crosschecked and a breast expert pathologist (ML) resolved discrepancies.

### *Tumor infiltrating lymphocytes*

In accordance with the recommendations of the international TILs Working Group(Dieci et al., 2018), we checked for presence of a mononuclear cell infiltrate in the stroma on hematoxylin and eosin-stained sections without additional staining, after excluding areas around ductal carcinomas in situ (DCIS), and tumor zones with necrosis and artifacts.

Infiltrates were scored on a continuous scale, as the mean percentage of the stromal area occupied by mononuclear cells. After NAC, we assessed TIL levels within the borders of the residual tumor bed, as defined by the RCB index(Symmans et al., 2007b). In cases of pCR, the scar area was measured on macroscopic examination. The scar appeared as a white area in the breast parenchyma corresponding to the tumor bed modified by NAC. It was characterized by the presence of histiocytes, lymphocytes, macrophages, fibrosis and elastosis. The whole fibro-inflammatory scar was evaluated on HE sections (size in mm and stromal TIL level evaluation)

## **Supplementary tables:**

**Supplementary Table 1:** Association between clinical and pathological pre and post-NAC parameters with relapse-free survival after univariate and multivariate analysis in the luminal population.  $p$  represents the p-value for the wald test , and  $p^*$  represents the individual p-value versus reference class. Abbreviations: pCR=pathological complete response; BMI=body mass index ; NST= no special type ; ER=oestrogen receptor; PR=progesterone receptor; RCB=residual cancer burden ; NAC=neoadjuvant chemotherapy; AC=anthracyclines ; LVI=lymphovascular invasion, TILs=tumor infiltrating lymphocytes

**Supplementary Table 2:** Association between clinical and pathological pre and post-NAC parameters with relapse-free survival (TNBC, univariate and multivariate analysis),  $p$  represents the p-value for the wald test , and  $p^*$  represents the individual p-value versus reference class. Abbreviations: pCR=pathological complete response; BMI=body mass index ; NST= no special type ; ER=oestrogen receptor; PR=progesterone receptor; NAC=neoadjuvant chemotherapy; AC=anthracyclines; TILs=tumor infiltrating lymphocytes; RCB=residual cancer burden; LVI=lymphovascular invasion

**Supplementary Table 3:** Association between clinical and pathological pre and post-NAC parameters with relapse-free survival (HER2-positive population, univariate and multivariate analysis),  $p$  represents the p-value for the wald test , and  $p^*$  represents the individual p-value versus reference class. Abbreviations: pCR=pathological complete response; BMI=body mass index ; NST= no special type ; ER=oestrogen receptor; PR=progesterone receptor; NAC=neoadjuvant chemotherapy; AC=anthracyclines; TILs=tumor infiltrating lymphocytes; RCB=residual cancer burden; LVI=lymphovascular invasion

**Supplementary Table 4:** Association between clinical and pathological pre and post-NAC parameters with overall-free survival (luminal population, univariate and multivariate analysis), *p* represents the p-value for the wald test , and *p*\* represents the individual p-value versus reference class. Abbreviations: pCR=pathological complete response; BMI=body mass index ; NST= no special type ; ER=oestrogen receptor; PR=progesterone receptor; NAC=neoadjuvant chemotherapy; AC=anthracyclines; TILs=tumor infiltrating lymphocytes; RCB=residual cancer burden; LVI=lymphovascular invasion

**Supplementary Table 5:** Association between clinical and pathological pre and post-NAC parameters with overall-free survival (TNBC population, univariate and multivariate analysis), *p* represents the p-value for the wald test, and *p*\* represents the individual p-value versus reference class. Abbreviations: pCR=pathological complete response; BMI=body mass index ; NST= no special type ; ER=oestrogen receptor; PR=progesterone receptor; NAC=neoadjuvant chemotherapy; AC=anthracyclines; TILs=tumor infiltrating lymphocytes; RCB=residual cancer burden; LVI=lymphovascular invasion

**Supplementary Table 6:** Association between clinical and pathological pre and post-NAC parameters with overall-free survival (HER2-positive population, univariate and multivariate analysis), *p* represents the p-value for the wald test , and *p*\* represents the individual p-value versus reference class. Abbreviations: pCR=pathological complete response; BMI=body mass index ; NST= no special type ; ER=oestrogen receptor; PR=progesterone receptor; NAC=neoadjuvant chemotherapy; AC=anthracyclines; TILs=tumor infiltrating lymphocytes; RCB=residual cancer burden; LVI=lymphovascular invasion

**Supplementary Table 7:** Summary of previous studies comparing prognosis according to RCB score after neoadjuvant chemotherapy (NAC). Abbreviations: CT stands for clinical trial and RA stands for retrospective analysis. Abbreviations: pCR=pathological complete response; BMI=body mass index ; NST= no special type ; ER=oestrogen receptor; PR=progesterone receptor; NAC=neoadjuvant chemotherapy; AC=anthracyclines; TILs=tumor infiltrating lymphocytes; RCB=residual cancer burden; LVI=lymphovascular invasion

**Supplementary Table 1: Association between clinical and pathological pre and post-NAC parameters with relapse-free survival after univariate and multivariate analysis in the luminal population.**

$p$  represents the p-value for the wald test , and  $p^*$  represents the individual p-value versus reference class. Abbreviations: pCR=pathological complete response; BMI=body mass index ; NST= no special type ; ER=oestrogen receptor; PR=progesterone receptor; RCB=residual cancer burden ; NAC=neoadjuvant chemotherapy; AC=anthracyclines ; LVI=lymphovascular invasion, TILs=tumor infiltrating lymphocytes.

| Luminal               |              |        |        |            |               |                  |                  |              |                 |              |
|-----------------------|--------------|--------|--------|------------|---------------|------------------|------------------|--------------|-----------------|--------------|
| Variable              | Class        | Number | Events | Univariate |               |                  |                  | Multivariate |                 |              |
|                       |              |        |        | HR         | CI            | $p^*$            | $p$              | HR           | CI              | $p$          |
| Pre-NAC parameters    |              |        |        |            |               |                  |                  |              |                 |              |
| Age (years)           | <45          | 88     | 34     | 1          |               |                  | 0.34             |              |                 |              |
|                       | 45-55        | 82     | 22     | 0.68       | [0.4 - 1.17]  |                  |                  |              |                 |              |
|                       | >55          | 52     | 19     | 0.99       | [0.56 - 1.74] |                  |                  |              |                 |              |
| Menopausal status     | pre          | 146    | 43     | 1          |               |                  | <b>0.042</b>     |              |                 |              |
|                       | post         | 74     | 30     | 1.63       | [1.02 - 2.61] |                  |                  |              |                 |              |
| BMI                   | 19≤BMI≤25    | 121    | 40     | 1          |               |                  | 0.904            |              |                 |              |
|                       | <19          | 18     | 7      | 1.12       | [0.49 - 2.52] |                  |                  |              |                 |              |
|                       | >25          | 83     | 28     | 0.93       | [0.57 - 1.51] |                  |                  |              |                 |              |
| Tumor size            | T1           | 10     | 6      | 1          |               |                  | 0.129            |              |                 |              |
|                       | T2           | 160    | 51     | 0.42       | [0.18 - 0.98] |                  |                  |              |                 |              |
|                       | T3           | 52     | 18     | 0.5        | [0.2 - 1.26]  |                  |                  |              |                 |              |
| Clinical nodal status | N0           | 79     | 27     | 1          |               |                  | 0.785            |              |                 |              |
|                       | N1-N2-N3     | 142    | 48     | 0.94       | [0.58 - 1.5]  |                  |                  |              |                 |              |
| Mitotic Index         | ≤22          | 153    | 52     | 1          |               |                  | 0.634            |              |                 |              |
|                       | >22          | 57     | 20     | 1.13       | [0.68 - 1.9]  |                  |                  |              |                 |              |
| Histology             | NST          | 199    | 63     | 1          |               |                  | <b>0.013</b>     |              |                 |              |
|                       | others       | 23     | 12     | 2.2        | [1.18 - 4.08] |                  |                  |              |                 |              |
| Grade                 | I-II         | 119    | 40     | 1          |               |                  | 0.779            |              |                 |              |
|                       | III          | 97     | 33     | 1.07       | [0.67 - 1.7]  |                  |                  |              |                 |              |
| ki67                  | <20 %        | 8      | 3      | 1          |               |                  | 0.92             |              |                 |              |
|                       | ≥20 %        | 8      | 3      | 0.92       | [0.19 - 4.58] |                  |                  |              |                 |              |
| PR status             | negative     | 43     | 19     | 1          |               |                  | 0.157            |              |                 |              |
|                       | positive     | 161    | 48     | 0.68       | [0.4 - 1.16]  |                  |                  |              |                 |              |
| TILs                  | (continuous) |        |        | 0,98       | [0.96-1.01]   |                  | 0,193            |              |                 |              |
| Post-NAC parameters   |              |        |        |            |               |                  |                  |              |                 |              |
| Nodal Involmt         | 0            | 78     | 19     | 1          |               |                  | <b>&lt;0.001</b> | 1            | -               | -            |
|                       | 1-3          | 100    | 30     | 1.2        | [0.68 - 2.14] | 0.53             |                  | 1.17         | [ 0.66 - 2.09 ] | 0.592        |
|                       | ≥4           | 44     | 26     | 2.77       | [1.53 - 5.01] | <b>&lt;0.001</b> |                  | 2.72         | [ 1.49 - 4.94 ] | <b>0.001</b> |
| RCB class             | pCR          | 11     | 3      | 1          |               |                  | 0.142            |              |                 |              |
|                       | RCB-I        | 18     | 2      | 0.37       | [0.06 - 2.23] | 0.277            |                  |              |                 |              |
|                       | RCB-II       | 109    | 33     | 1.13       | [0.35 - 3.69] | 0.839            |                  |              |                 |              |
|                       | RCB-III      | 84     | 37     | 1.58       | [0.49 - 5.14] | 0.446            |                  |              |                 |              |
| NAC regimen           | AC           | 3      | 2      | 1          |               |                  | 0.647            |              |                 |              |
|                       | AC-Taxanes   | 202    | 68     | 0.51       | [0.13 - 2.1]  |                  |                  |              |                 |              |
|                       | others       | 17     | 5      | 0.5        | [0.1 - 2.57]  |                  |                  |              |                 |              |
| Post-NAC LVI          | no           | 130    | 42     | 1          |               |                  | 0.366            |              |                 |              |
|                       | yes          | 67     | 27     | 1.25       | [0.77 - 2.03] |                  |                  |              |                 |              |
| TILs                  | (continuous) |        |        | 0,99       | [0.96-1.01]   |                  | 0,331            |              |                 |              |

**Supplementary Table 2: Association between clinical and pathological pre and post-NAC parameters with relapse-free survival (TNBC, univariate and multivariate analysis).**

*p* represents the p-value for the wald test , and *p\** represents the individual p-value versus reference class. Abbreviations: pCR=pathological complete response; BMI=body mass index ; NST= no special type ; ER=oestrogen receptor; PR=progesterone receptor; NAC=neoadjuvant chemotherapy; AC=anthracyclines; TILs=tumor infiltrating lymphocytes; RCB=residual cancer burden; LVI=lymphovascular invasion.

| TNBC                  |              |        |        |            |                |                  |                  |              |                  |                  |
|-----------------------|--------------|--------|--------|------------|----------------|------------------|------------------|--------------|------------------|------------------|
| Variable              | Class        | Number | Events | Univariate |                |                  |                  | Multivariate |                  |                  |
|                       |              |        |        | HR         | CI             | <i>p*</i>        | <i>p</i>         | HR           | CI               | <i>p</i>         |
| Pre-NAC parameters    |              |        |        |            |                |                  |                  |              |                  |                  |
| Age                   | <45          | 119    | 41     | 1          |                |                  | 0.732            |              |                  |                  |
|                       | 45-55        | 118    | 37     | 0.91       | [0.58 - 1.41]  |                  |                  |              |                  |                  |
|                       | >55          | 82     | 24     | 0.82       | [0.49 - 1.35]  |                  |                  |              |                  |                  |
| Menopausal status     | pre          | 191    | 62     | 1          |                |                  | 0.748            |              |                  |                  |
|                       | post         | 124    | 38     | 0.94       | [0.62 - 1.4]   |                  |                  |              |                  |                  |
| BMI                   | 19≤BMI≤25    | 176    | 59     | 1          |                |                  | 0.348            |              |                  |                  |
|                       | <19          | 16     | 2      | 0.35       | [0.09 - 1.45]  |                  |                  |              |                  |                  |
|                       | >25          | 126    | 41     | 0.99       | [0.67 - 1.48]  |                  |                  |              |                  |                  |
| Tumor size            | T1           | 27     | 6      | 1          |                |                  | <b>0.004</b>     | 1            | -                | -                |
|                       | T2           | 207    | 59     | 1.36       | [0.59 - 3.14]  | 0.477            |                  | 1,12         | [ 0.47 - 2.65 ]  | 0,8              |
|                       | T3           | 85     | 37     | 2.6        | [1.09 - 6.17]  | <b>0.03</b>      |                  | 2,08         | [ 0.86 - 5.02 ]  | 0.102*           |
| Clinical nodal status | N0           | 141    | 42     | 1          |                |                  | 0.293            |              |                  |                  |
|                       | N1-N2-N3     | 178    | 60     | 1.24       | [0.83 - 1.84]  |                  |                  |              |                  |                  |
| Mitotic Index         | ≤22          | 124    | 38     | 1          |                |                  | 0.398            |              |                  |                  |
|                       | >22          | 177    | 62     | 1.19       | [0.79 - 1.78]  |                  |                  |              |                  |                  |
| Histology             | NST          | 291    | 91     | 1          |                |                  | 0.46             |              |                  |                  |
|                       | others       | 25     | 10     | 1.28       | [0.67 - 2.46]  |                  |                  |              |                  |                  |
| Grade                 | I-II         | 40     | 14     | 1          |                |                  | 0.812            |              |                  |                  |
|                       | III          | 272    | 86     | 0.93       | [0.53 - 1.64]  |                  |                  |              |                  |                  |
| Ki67                  | <20 %        | 22     | 7      | 1          |                |                  | 0.584            |              |                  |                  |
|                       | ≥20 %        | 120    | 45     | 1.25       | [0.56 - 2.77]  |                  |                  |              |                  |                  |
| NAC regimen           | AC           | 54     | 22     | 1          |                |                  | 0.225            |              |                  |                  |
|                       | AC-Taxanes   | 222    | 71     | 0.84       | [0.52 - 1.36]  |                  |                  |              |                  |                  |
|                       | Others       | 43     | 9      | 0.51       | [0.23 - 1.1]   |                  |                  |              |                  |                  |
| TILs                  | (continuous) |        |        | 0,98       | [0.98-0.99]    |                  | <b>0,006</b>     |              |                  |                  |
| Post-NAC parameters   |              |        |        |            |                |                  |                  |              |                  |                  |
| Nodal Involvement     | 0            | 238    | 52     | 1          |                |                  | <b>&lt;0.001</b> |              |                  |                  |
|                       | 1-3          | 49     | 29     | 3.72       | [2.36 - 5.88]  | <b>&lt;0.001</b> |                  |              |                  |                  |
|                       | ≥4           | 32     | 21     | 4.54       | [2.73 - 7.56]  | <b>&lt;0.001</b> |                  |              |                  |                  |
| RCB class             | pCR          | 123    | 18     | 1          |                |                  | <b>&lt;0.001</b> | 1            | -                | -                |
|                       | RCB-I        | 23     | 4      | 1.23       | [0.42 - 3.63]  | 0.711            |                  | 1,18         | [ 0.4 - 3.53 ]   | 0,762            |
|                       | RCB-II       | 131    | 50     | 3.1        | [1.81 - 5.31]  | <b>&lt;0.001</b> |                  | 2,7          | [ 1.55 - 4.7 ]   | <0.001           |
|                       | RCB-III      | 42     | 30     | 9.01       | [4.99 - 16.27] | <b>&lt;0.001</b> |                  | 6,77         | [ 3.52 - 13.01 ] | <b>&lt;0.001</b> |
| LVI                   | no           | 232    | 56     | 1          |                |                  | <b>&lt;0.001</b> | 1            | -                | -                |
|                       | yes          | 55     | 34     | 3.5        | [2.28 - 5.38]  | <b>&lt;0.001</b> |                  | 1,57         | [ 1 - 2.47 ]     | <b>0,049</b>     |
| TILs                  | (continuous) |        |        | 1          | [0.99-1.01]    |                  | 0,98             |              |                  |                  |

\* *p*-value T3 versus T2 : 0.003

**Supplementary Table 3: Association between clinical and pathological pre and post-NAC parameters with relapse-free survival (HER2-positive population, univariate and multivariate analysis).**

*p* represents the p-value for the wald test , and *p*\* represents the individual p-value versus reference class. Abbreviations: pCR=pathological complete response; BMI=body mass index ; NST= no special type ; ER=oestrogen receptor; PR=progesterone receptor; NAC=neoadjuvant chemotherapy; AC=anthracyclines; TILs=tumor infiltrating lymphocytes; RCB=residual cancer burden; LVI=lymphovascular invasion.

|                       |              |        |        | HER2- positive |                |                  |                  |              |                  |                  |
|-----------------------|--------------|--------|--------|----------------|----------------|------------------|------------------|--------------|------------------|------------------|
|                       |              |        |        | Univariate     |                |                  |                  | Multivariate |                  |                  |
| Variable              | Class        | Number | Events | HR             | CI             | p*               | <i>p</i>         | HR           | CI               | <i>p</i>         |
| Pre-NAC parameters    |              |        |        |                |                |                  |                  |              |                  |                  |
| Age (years)           | <45          | 78     | 17     | 1              |                |                  | 0.104            |              |                  |                  |
|                       | 45-55        | 54     | 8      | 0.63           | [0.27 - 1.48]  | 0.291            |                  |              |                  |                  |
|                       | >55          | 44     | 3      | 0.28           | [0.08 - 0.95]  | <b>0.042</b>     |                  |              |                  |                  |
| Menopausal status     | pre          | 114    | 22     | 1              |                |                  | 0.099            |              |                  |                  |
|                       | post         | 61     | 6      | 0.47           | [0.19 - 1.15]  |                  |                  |              |                  |                  |
| BMI                   | 19≤BMI≤25    | 117    | 12     | 1              |                |                  | <b>0.011</b>     | 1            | -                | -                |
|                       | <19          | 7      | 2      | 3.16           | [0.7 - 14.19]  | 0.133            |                  | 6,24         | [ 1.12 - 34.66 ] | <b>0,036</b>     |
|                       | >25          | 52     | 14     | 3.17           | [1.46 - 6.88]  | <b>0.004</b>     |                  | 2,88         | [ 1.25 - 6.63 ]  | <b>0,013</b>     |
| Tumor Size            | T1           | 10     | 1      | 1              |                |                  | 0.642            |              |                  |                  |
|                       | T2           | 114    | 17     | 1.43           | [0.19 - 10.74] |                  |                  |              |                  |                  |
|                       | T3           | 52     | 10     | 1.97           | [0.25 - 15.46] |                  |                  |              |                  |                  |
| Clinical Nodal Status | N0           | 62     | 9      | 1              |                |                  | 0.695            |              |                  |                  |
|                       | N1-N2-N3     | 114    | 19     | 1.17           | [0.53 - 2.59]  |                  |                  |              |                  |                  |
| Mitotic Index         | ≤22          | 112    | 20     | 1              |                |                  | 0.679            |              |                  |                  |
|                       | >22          | 59     | 8      | 0.84           | [0.37 - 1.91]  |                  |                  |              |                  |                  |
| Histology             | NST          | 170    | 28     | 1              |                |                  | 0.998            |              |                  |                  |
|                       | other        | 5      | 0      | 0              | NA             |                  |                  |              |                  |                  |
| Grade                 | I-II         | 52     | 16     | 1              |                |                  | <b>0.002</b>     | 1            | -                | -                |
|                       | III          | 121    | 12     | 0.3            | [0.14 - 0.63]  |                  |                  | 0,19         | [ 0.08 - 0.43 ]  | <b>&lt;0.001</b> |
| ki67                  | <20 %        | 3      | 0      | 1              |                |                  | 0.999            |              |                  |                  |
|                       | ≥20 %        | 18     | 3      | NA             | NA             |                  |                  |              |                  |                  |
| ER status             | negative     | 77     | 10     | 1              |                |                  | 0.364            |              |                  |                  |
|                       | positive     | 99     | 18     | 1.43           | [0.66 - 3.1]   |                  |                  |              |                  |                  |
| PR status             | negative     | 111    | 14     | 1              |                |                  | 0.381            |              |                  |                  |
|                       | positive     | 60     | 11     | 1.42           | [0.65 - 3.14]  |                  |                  |              |                  |                  |
| NAC regimen           | AC           | 4      | 1      | 1              |                |                  | 0.279            |              |                  |                  |
|                       | AC-Taxanes   | 152    | 22     | 0.64           | [0.09 - 4.72]  |                  |                  |              |                  |                  |
|                       | Others       | 20     | 5      | 1.39           | [0.16 - 11.96] |                  |                  |              |                  |                  |
| TILs                  | (continuous) |        |        | 0,99           | [0.98-1.01]    |                  | 0,619            |              |                  |                  |
| Post-NAC parameters   |              |        |        |                |                |                  |                  |              |                  |                  |
| Nodal involvement     | 0            | 129    | 15     | 1              |                |                  | <b>0.04</b>      |              |                  |                  |
|                       | 1-3          | 39     | 10     | 2.16           | [0.97 - 4.81]  | 0.06             |                  |              |                  |                  |
|                       | others       | 8      | 3      | 3.86           | [1.11 - 13.4]  | <b>0.033</b>     |                  |              |                  |                  |
| RCB class             | pCR          | 68     | 2      | 1              |                |                  | <b>0.002</b>     | 1            | -                | -                |
|                       | RCB-I        | 24     | 1      | 1.52           | [0.14 - 16.81] | 0.731            |                  | 2,72         | [ 0.24 - 31.02 ] | 0,421            |
|                       | RCB-II       | 69     | 19     | 10.27          | [2.39 - 44.11] | <b>0.002</b>     |                  | 7,17         | [ 1.56 - 32.89 ] | <b>0,011</b>     |
|                       | RCB-III      | 15     | 6      | 16.53          | [3.33 - 82.01] | <b>&lt;0.001</b> |                  | 12,51        | [ 2.36 - 66.27 ] | <b>0,003</b>     |
| LVI                   | no           | 138    | 10     | 1              |                |                  | <b>&lt;0.001</b> | 1            | -                | -                |
|                       | yes          | 26     | 14     | 10.29          | [4.55 - 23.27] | <b>&lt;0.001</b> |                  | 6,24         | [ 2.68 - 14.56 ] | <b>&lt;0.001</b> |
| TILs                  | (continuous) |        |        | 1,03           | [1.01-1.06]    |                  | <b>0,001</b>     |              |                  |                  |



**Supplementary Table 4: Association between clinical and pathological pre and post-NAC parameters with overall-free survival (luminal population, univariate and multivariate analysis).**

*p* represents the p-value for the wald test , and *p*\* represents the individual p-value versus reference class. Abbreviations: pCR=pathological complete response; BMI=body mass index ; NST= no special type ; ER=oestrogen receptor; PR=progesterone receptor; NAC=neoadjuvant chemotherapy; AC=anthracyclines; TILs=tumor infiltrating lymphocytes; RCB=residual cancer burden; LVI=lymphovascular invasion

|                       |              |        |        | Luminal    |               |              |              |              |                |              |
|-----------------------|--------------|--------|--------|------------|---------------|--------------|--------------|--------------|----------------|--------------|
|                       |              |        |        | Univariate |               |              |              | Multivariate |                |              |
| Variable              | Class        | Number | Events | HR         | CI            | p*           | p            | HR           | CI             | p            |
| Pre-NAC parameters    |              |        |        |            |               |              |              |              |                |              |
| Age (years)           | <45 y.o      | 88     | 19     | 1          |               |              | 0.942        |              |                |              |
|                       | 45-55 y.o    | 82     | 17     | 1.11       | [0.57 - 2.14] |              |              |              |                |              |
|                       | >55 y.o      | 52     | 10     | 0.99       | [0.46 - 2.13] |              |              |              |                |              |
| Menopausal status     | pre          | 146    | 24     | 1          |               |              | <b>0.022</b> | 1            | -              | -            |
|                       | post         | 74     | 20     | 2.01       | [1.1 - 3.64]  |              |              | 2.01         | [ 1.1 - 3.64 ] | <b>0.022</b> |
| BMI class             | 19≤BMI≤25    | 121    | 27     | 1          |               |              | 0.613        |              |                |              |
|                       | <19          | 18     | 4      | 1.11       | [0.39 - 3.17] |              |              |              |                |              |
|                       | >25          | 83     | 15     | 0.75       | [0.4 - 1.4]   |              |              |              |                |              |
| Tumor size            | T1           | 10     | 3      | 1          |               |              | 0.642        |              |                |              |
|                       | T2           | 160    | 31     | 0.63       | [0.19 - 2.06] |              |              |              |                |              |
|                       | T3           | 52     | 12     | 0.78       | [0.22 - 2.8]  |              |              |              |                |              |
| Clinical nodal status | N0           | 79     | 15     | 1          |               |              | 0.862        |              |                |              |
|                       | N1-N2-N3     | 142    | 31     | 1.06       | [0.57 - 1.96] |              |              |              |                |              |
| Mitotic Index         | ≤22          | 153    | 30     | 1          |               |              | 0.195        |              |                |              |
|                       | >22          | 57     | 14     | 1.53       | [0.8 - 2.92]  |              |              |              |                |              |
| Histology             | NST          | 199    | 41     | 1          |               |              | 0.778        |              |                |              |
|                       | others       | 23     | 5      | 1.14       | [0.45 - 2.9]  |              |              |              |                |              |
| Grade                 | I-II         | 119    | 23     | 1          |               |              | 0.454        |              |                |              |
|                       | III          | 97     | 22     | 1.25       | [0.7 - 2.25]  |              |              |              |                |              |
| ki67                  | <20          | 8      | 1      | 1          |               |              | 0.361        |              |                |              |
|                       | ≥20          | 8      | 3      | 2.87       | [0.3 - 27.63] |              |              |              |                |              |
| PR status             | negative     | 43     | 12     | 1          |               |              | 0.363        |              |                |              |
|                       | positive     | 161    | 29     | 0.73       | [0.37 - 1.44] |              |              |              |                |              |
| NAC regimen           | AC           | 3      | 1      | 1          |               |              | 0.471        |              |                |              |
|                       | AC-Taxanes   | 202    | 44     | 1.07       | [0.15 - 7.81] |              |              |              |                |              |
|                       | Others       | 17     | 1      | 0.31       | [0.02 - 4.99] |              |              |              |                |              |
| TILs                  | (continuous) |        |        | 0,99       | [0.97-1.01]   |              | 0,47         |              |                |              |
| Post-NAC parameters   |              |        |        |            |               |              |              |              |                |              |
| RCB                   | pCR          | 11     | 2      | 1          |               |              | 0.968        |              |                |              |
|                       | RCB-I        | 18     | 0      | 0          | [0 - Inf]     | 0.997        |              |              |                |              |
|                       | RCB-II       | 109    | 22     | 1.08       | [0.25 - 4.6]  | 0.918        |              |              |                |              |
|                       | RCB-III      | 84     | 22     | 1.24       | [0.29 - 5.32] | 0.769        |              |              |                |              |
| Nodal involmnet       | 0            | 78     | 11     | 1          |               |              | <b>0.048</b> |              |                |              |
|                       | 1-3          | 100    | 19     | 1.23       | [0.59 - 2.6]  | 0.58         |              |              |                |              |
|                       | ≥4           | 44     | 16     | 2.42       | [1.12 - 5.24] | <b>0.025</b> |              |              |                |              |
| LVI                   | no           | 130    | 23     | 1          |               |              | 0.072        |              |                |              |
|                       | yes          | 67     | 20     | 1.73       | [0.95 - 3.16] | 0.072        |              |              |                |              |
| TILs                  | (continuous) |        |        | 0,99       | [0.97-1.03]   |              | 0,715        |              |                |              |

**Supplementary Table 5: Association between clinical and pathological pre and post-NAC parameters with overall-free survival (TNBC population, univariate and multivariate analysis).**

$p$  represents the p-value for the wald test, and  $p^*$  represents the individual p-value versus reference class. Abbreviations: pCR=pathological complete response; BMI=body mass index ; NST= no special type ; ER=oestrogen receptor; PR=progesterone receptor; NAC=neoadjuvant chemotherapy; AC=anthracyclines; TILs=tumor infiltrating lymphocytes; RCB=residual cancer burden; LVI=lymphovascular invasion.

| TNBC                  |              |        |        |            |                |                  |                  |              |                  |                  |
|-----------------------|--------------|--------|--------|------------|----------------|------------------|------------------|--------------|------------------|------------------|
| Variable              | Class        | Number | Events | Univariate |                |                  |                  | Multivariate |                  |                  |
|                       |              |        |        | HR         | CI             | $p^*$            | $p$              | HR           | CI               | $p$              |
| Pre-NAC parameters    |              |        |        |            |                |                  |                  |              |                  |                  |
| Age (years)           | <45          | 119    | 33     | 1          |                |                  | 0.479            |              |                  |                  |
|                       | 45-55        | 118    | 26     | 0.79       | [0.47 - 1.32]  |                  |                  |              |                  |                  |
|                       | >55          | 82     | 17     | 0.72       | [0.4 - 1.3]    |                  |                  |              |                  |                  |
| Menopausal status     | pre          | 191    | 48     | 1          |                |                  | 0.596            |              |                  |                  |
|                       | post         | 124    | 28     | 0.88       | [0.55 - 1.41]  |                  |                  |              |                  |                  |
| BMI class             | 19≤BMI≤25    | 176    | 43     | 1          |                |                  | 0.562            |              |                  |                  |
|                       | <19          | 16     | 2      | 0.47       | [0.11 - 1.93]  |                  |                  |              |                  |                  |
|                       | >25          | 126    | 31     | 1.01       | [0.64 - 1.61]  |                  |                  |              |                  |                  |
| Tumor size            | T1           | 27     | 4      | 1          |                |                  | <b>0.007</b>     | 1            | -                | -                |
|                       | T2           | 207    | 42     | 1.47       | [0.53 - 4.09]  | 0.465            |                  | 0.99         | [ 0.35 - 2.84 ]  | 0.989            |
|                       | T3           | 85     | 30     | 2.91       | [1.03 - 8.27]  | 0.045            |                  | 1.92         | [ 0.67 - 5.56 ]  | 0.227*           |
| Clinical nodal status | N0           | 141    | 30     | 1          |                |                  | <b>0.317</b>     |              |                  |                  |
|                       | N1-N2-N3     | 178    | 46     | 1.27       | [0.8 - 2]      |                  |                  |              |                  |                  |
| Mitotic Index         | ≤22          | 124    | 27     | 1          |                |                  | 0.353            |              |                  |                  |
|                       | >22          | 177    | 48     | 1.25       | [0.78 - 2]     |                  |                  |              |                  |                  |
| Histology             | NST          | 291    | 69     | 1          |                |                  | 0.967            |              |                  |                  |
|                       | others       | 25     | 6      | 0.98       | [0.43 - 2.26]  |                  |                  |              |                  |                  |
| Grade                 | I-II         | 40     | 8      | 1          |                |                  | 0.605            |              |                  |                  |
|                       | III          | 272    | 66     | 1.21       | [0.58 - 2.53]  |                  |                  |              |                  |                  |
| Ki67 (%)              | <20          | 22     | 4      | 1          |                |                  | 0.492            |              |                  |                  |
|                       | ≥ 20         | 120    | 32     | 1.44       | [0.51 - 4.07]  |                  |                  |              |                  |                  |
| NAC regimen           | AC           | 54     | 12     | 1          |                |                  | 0.418            |              |                  |                  |
|                       | AC-Taxanes   | 222    | 57     | 1.22       | [0.65 - 2.27]  |                  |                  |              |                  |                  |
|                       | Others       | 43     | 7      | 0.74       | [0.29 - 1.88]  |                  |                  |              |                  |                  |
| TILs                  | (continuous) |        |        | 0,98       | [0.98-0.99]    |                  | <b>0,009</b>     |              |                  |                  |
| Post-NAC parameters   |              |        |        |            |                |                  |                  |              |                  |                  |
| Nodal Involment       | 0            | 238    | 35     | 1          |                |                  | <b>&lt;0.001</b> |              |                  |                  |
|                       | 1-3          | 49     | 23     | 3.9        | [2.3 - 6.6]    | <b>&lt;0.001</b> |                  |              |                  |                  |
|                       | ≥4           | 32     | 18     | 5.27       | [2.98 - 9.32]  | <b>&lt;0.001</b> |                  |              |                  |                  |
| RCB class             | pCR          | 123    | 9      | 1          |                |                  | <b>&lt;0.001</b> | 1            | -                | -                |
|                       | RCB-I        | 23     | 2      | 1.24       | [0.27 - 5.74]  | 0.784            |                  | 1.18         | [ 0.25 - 5.51 ]  | 0,834            |
|                       | RCB-II       | 131    | 39     | 4.71       | [2.28 - 9.73]  | <b>&lt;0.001</b> |                  | 4            | [ 1.9 - 8.41 ]   | <b>&lt;0.001</b> |
|                       | RCB-III      | 42     | 26     | 12.09      | [5.65 - 25.87] | <b>&lt;0.001</b> |                  | 8.38         | [ 3.66 - 19.15 ] | <b>&lt;0.001</b> |
| LVI                   | no           | 232    | 41     | 1          |                |                  | <b>&lt;0.001</b> | 1            | -                | -                |
|                       | yes          | 55     | 28     | 3.69       | [2.28 - 5.99]  | <b>&lt;0.001</b> |                  | 1.8          | [ 1.08 - 2.99 ]  | <b>0.024</b>     |
| TILs                  | (continuous) |        |        | 1,01       | [0.99-1.01]    |                  | 0,817            |              |                  |                  |

\* p-value T3 versus T2 : 0.006

**Supplementary Table 6: Association between clinical and pathological pre and post-NAC parameters with overall-free survival (HER2-positive population, univariate and multivariate analysis).**

*p* represents the p-value for the wald test , and *p\** represents the individual p-value versus reference class. Abbreviations: pCR=pathological complete response; BMI=body mass index ; NST= no special type ; ER=oestrogen receptor; PR=progesterone receptor; NAC=neoadjuvant chemotherapy; AC=anthracyclines; TILs=tumor infiltrating lymphocytes; RCB=residual cancer burden; LVI=lymphovascular invasion

| HER2 -positive        |            |        |        |            |                 |           |          |              |                  |          |
|-----------------------|------------|--------|--------|------------|-----------------|-----------|----------|--------------|------------------|----------|
| Variable              | Class      | Number | Events | Univariate |                 |           |          | Multivariate |                  |          |
|                       |            |        |        | HR         | CI              | <i>p*</i> | <i>p</i> | HR           | CI               | <i>p</i> |
| Pre-NAC parameters    |            |        |        |            |                 |           |          |              |                  |          |
| Age (years)           | <45        | 78     | 5      | 1          |                 |           | 0.5      |              |                  |          |
|                       | 45-55      | 54     | 5      | 1.19       | [0.34 - 4.15]   |           |          |              |                  |          |
|                       | >55        | 44     | 1      | 0.33       | [0.04 - 2.81]   |           |          |              |                  |          |
| Menopausal status     | pre        | 114    | 8      | 1          |                 |           | 0.513    |              |                  |          |
|                       | post       | 61     | 3      | 0.64       | [0.17 - 2.42]   |           |          |              |                  |          |
| BMI class             | 19≤BMI≤25  | 117    | 4      | 1          |                 |           | 0.019    | 1            | -                | -        |
|                       | <19        | 7      | 2      | 11.3       | [1.97 - 64.75]  | 0.006     |          | 12.86        | [ 2.24 - 73.84 ] | 0.004    |
|                       | >25        | 52     | 5      | 3.43       | [0.92 - 12.86]  | 0.067     |          | 2.49         | [ 0.66 - 9.74 ]  | 0.18     |
| Tumor Size            | T1         | 10     | 1      | 1          |                 |           | 0.269    |              |                  |          |
|                       | T2         | 114    | 5      | 0.28       | [0.03 - 2.5]    |           |          |              |                  |          |
|                       | T3         | 52     | 5      | 0.7        | [0.08 - 6.15]   |           |          |              |                  |          |
| Clinical Nodal Status | N0         | 62     | 3      | 1          |                 |           | 0.622    |              |                  |          |
|                       | N1-N2-N3   | 114    | 8      | 1.4        | [0.37 - 5.28]   |           |          |              |                  |          |
| Mitotic Index         | ≤22        | 112    | 7      | 1          |                 |           | 0.458    |              |                  |          |
|                       | >22        | 59     | 4      | 1.61       | [0.46 - 5.68]   |           |          |              |                  |          |
| Histology             | NST        | 170    | 11     | 1          |                 |           | 0.998    |              |                  |          |
|                       | others     | 5      | 0      | 0          | [0 - Inf]       |           |          |              |                  |          |
| Grade                 | I-II       | 52     | 5      | 1          |                 |           | 0.373    |              |                  |          |
|                       | III        | 121    | 6      | 0.58       | [0.18 - 1.92]   |           |          |              |                  |          |
| ER status             | negative   | 77     | 4      | 1          |                 |           | 0.601    |              |                  |          |
|                       | positive   | 99     | 7      | 1.39       | [0.41 - 4.75]   |           |          |              |                  |          |
| PR status             | negative   | 111    | 5      | 1          |                 |           | 0.712    |              |                  |          |
|                       | positive   | 60     | 4      | 1.28       | [0.34 - 4.78]   |           |          |              |                  |          |
| NAC regimen           | AC         | 4      | 0      | 1          |                 |           | 0.471    |              |                  |          |
|                       | AC-Taxanes | 152    | 9      | NA         | [0 - Inf]       |           |          |              |                  |          |
|                       | Others     | 20     | 2      | NA         | [0 - Inf]       |           |          |              |                  |          |
| TILs (continuous)     |            |        |        | 0.99       | [0.95-1.03]     |           | 0.732    |              |                  |          |
| Post-NAC parameters   |            |        |        |            |                 |           |          |              |                  |          |
| Nodal involment       | 0          | 129    | 5      | 1          |                 |           | 0.05     |              |                  |          |
|                       | 1-3        | 39     | 4      | 2.16       | [0.58 - 8.08]   | 0.253     |          |              |                  |          |
|                       | ≥4         | 8      | 2      | 7.72       | [1.49 - 40.04]  | 0.015     |          |              |                  |          |
| RCB class             | pCR        | 68     | 1      | 1          |                 |           | 0.146    |              |                  |          |
|                       | RCB-I      | 24     | 0      | 0          | [0 - Inf]       | 0.998     |          |              |                  |          |
|                       | RCB-II     | 69     | 7      | 6.07       | [0.75 - 49.48]  | 0.092     |          |              |                  |          |
|                       | RCB-III    | 15     | 3      | 14.25      | [1.48 - 137.27] | 0.022     |          |              |                  |          |
| LVI                   | no         | 138    | 2      | 1          |                 |           | <0.001   | 1            | -                | -        |
|                       | yes        | 26     | 7      | 20.12      | [4.17 - 97.13]  | <0.001    |          | 9.74         | [ 2.77 - 34.32 ] | <0.001   |
| TILs (continuous)     |            |        |        | 1.02       | [0.98-1.01]     |           | 0.328    |              |                  |          |

**Supplementary Table 7: Summary of previous studies comparing prognosis according to RCB score after neoadjuvant chemotherapy (NAC).**

Abbreviations: CT stands for clinical trial and RA stands for retrospective analysis. Abbreviations: pCR=pathological complete response;

| Study                                                                     | Study type                        | Number of patients (% of the cohort) |                         |                                     |                         | Median Follow-up                                               | 5 years RFS whole population                                                                                                       | HR whole population                                                                                                                                                                                                             | 5 y. RFS luminal                                                    | 5 y. RFS TNBC                                                        | 5 y. RFS HER2                                                                                                  | HR RFS luminal                                                                                                                          | HR RFS TNBC                                                                                                                    | HR RFS HER2                                                                                                                        |
|---------------------------------------------------------------------------|-----------------------------------|--------------------------------------|-------------------------|-------------------------------------|-------------------------|----------------------------------------------------------------|------------------------------------------------------------------------------------------------------------------------------------|---------------------------------------------------------------------------------------------------------------------------------------------------------------------------------------------------------------------------------|---------------------------------------------------------------------|----------------------------------------------------------------------|----------------------------------------------------------------------------------------------------------------|-----------------------------------------------------------------------------------------------------------------------------------------|--------------------------------------------------------------------------------------------------------------------------------|------------------------------------------------------------------------------------------------------------------------------------|
|                                                                           |                                   | n                                    | TNBC                    | HER2                                | HR+/HER2-               |                                                                |                                                                                                                                    |                                                                                                                                                                                                                                 |                                                                     |                                                                      |                                                                                                                |                                                                                                                                         |                                                                                                                                |                                                                                                                                    |
| Symmans (2007)<br><i>Journal of clinical oncology</i>                     | CT<br>T-FAC<br>FAC                | 382<br>241<br>141                    | NA                      | NA                                  | NA                      | 67.3 months<br>104.7 months                                    | RCB-0: 78.2%<br>RCB-I: 83.3%<br>RCB-II: 68.4%<br>RCB-III: 43.3%                                                                    | HR = 2.50<br>CI [1.70-3.69]<br>p<0.001                                                                                                                                                                                          | NA                                                                  | NA                                                                   | NA                                                                                                             | NA                                                                                                                                      | NA                                                                                                                             | NA                                                                                                                                 |
| Romero (2012)<br><i>Annals of Oncology</i>                                | CT                                | 151                                  | NA                      | NA                                  | NA                      | 53.9 months                                                    | RCB-0: 81%<br>RCB-I: 66%<br>RCB-II: 66%<br>RCB-III: 35%                                                                            | RCB- III vs RCB [0-II] = 3.9<br>CI [2336-6401]<br>p = 0.0001                                                                                                                                                                    | NA                                                                  | NA                                                                   | NA                                                                                                             | NA                                                                                                                                      | NA                                                                                                                             | NA                                                                                                                                 |
| Corben (2013)<br><i>Arch. Pathol. Lab. Med.</i>                           | CT                                | 56                                   | NA                      | NA                                  | NA                      | 93 months                                                      | RCB-0: 100%<br>RCB-I: 100%<br>RCB-II: 53%<br>RCB-III: 47%                                                                          | HR = 2.08<br>CI [0.89 - 5.43]<br>p = 0.11                                                                                                                                                                                       | NA                                                                  | NA                                                                   | NA                                                                                                             | NA                                                                                                                                      | NA                                                                                                                             | NA                                                                                                                                 |
| Sheri (2015)<br><i>Annals of Oncology</i>                                 | RA                                | 220                                  | NA                      | NA                                  | NA                      | 61 months                                                      | RCB-0: 91.7%<br>RCB-I: 77.4%<br>RCB-II: 72.7%<br>RCB-III: 38.9%                                                                    | RCB-0: HR = 1<br>RCB-I: HR = 2.8 ; CI [0.7-11.2] ; p = 0.145<br>RCB-II: HR = 3.0 ; CI [1.1- 8.7] ; p = 0.04<br>RCB-III: HR = 10.36 ; CI [3.7-29.3] ; p < 0.001                                                                  | NA                                                                  | NA                                                                   | NA                                                                                                             | NA                                                                                                                                      | NA                                                                                                                             | NA                                                                                                                                 |
| Lee (2015)<br><i>Plos</i>                                                 | RA                                | 594                                  | 158<br>(26.6%)          | 163<br>(27.4%)<br>74 HR+/<br>89 HR- | 273<br>(46%)            | 37.2 months                                                    | NA                                                                                                                                 | NA                                                                                                                                                                                                                              | NA                                                                  | NA                                                                   | p=0.005                                                                                                        | p<0.001                                                                                                                                 | p=0.054 for HR+<br>p=0.221 for HR-                                                                                             |                                                                                                                                    |
| Symmans (2017)<br><i>Journal of clinical Oncology</i>                     | RA<br>T/FAC-1-3<br>FAC<br>H+T/FEC | 823<br>132<br>203                    | 219<br>(27%)<br>NA<br>0 | 103<br>(12%)<br>NA<br>203 (100%)    | 501<br>(61%)<br>NA<br>0 | T/FAC-1-3: 6.8<br>y to 13.5 y<br>FAC: 16.4 y<br>H+T/FEC: 7.1 y | T/FAC ; FAC ; H+T/FEC<br>RCB-0: 92% ; 100% ; 95%<br>RCB-I: 94% ; 100% ; 81%<br>RCB-II: 80% ; 73% ; 74%<br>RCB-III: 58% ; 66% ; 21% | NA                                                                                                                                                                                                                              | RCB-0: 88%<br>RCB-I: 100%<br>RCB-II: 87%<br>RCB-III: 70%            | RCB-0: 94%<br>RCB-I: 89%<br>RCB-II: 62%<br>RCB-III: 26%              | Without / with Trastuzumab:<br>RCB-0: 94% / 95%<br>RCB-I: 89% / 81%<br>RCB-II: 62% / 74%<br>RCB-III: 47% / 21% | HR = 2.28<br>CI [1.76-2.96]                                                                                                             | HR = 1.92 ;<br>CI [1.49-2.46]                                                                                                  | With trastuzumab<br>HR = 1.8 ;<br>CI [1.26-2.59]                                                                                   |
| Campbell (2018)<br><i>Breast Cancer Research Treatment</i>                | CT                                | 162                                  | 46<br>(28.4%)           | 29<br>(17.9%)                       | 87<br>(53.7%)           | 6.7 y                                                          | RCB-0: 86.5%<br>RCB-I: 84.8%<br>RCB-II: 74.6%<br>RCB-III: 40.5%                                                                    | RCB-0: HR = 1<br>RCB-I: HR = 4.49 ; CI [1.07-18.79] ; p = 0.04<br>RCB-II: HR = 4.31 ; CI [1.29- 14.36] ; p = 0.02<br>RCB-III: HR = 11.07 ; CI [3.32-36.91] ; p<0.0001<br>RCB III vs 0/II : HR = 3.37 ; IC [1.96-5.8] ; p<0.0001 | RCB-0: 87.5%<br>RCB-I: 100%<br>RCB-II: 81.6%<br>RCB-III: 60.9%      | RCB-0: 88.2%<br>RCB-I: 100%<br>RCB-II: 58.8%<br>RCB-III: 10%         | RCB-0: 83.3%<br>RCB-I: 50%<br>RCB-II: 66.6%<br>RCB-III: 0%                                                     | NA                                                                                                                                      | RCB-0: 1<br>RCB-I: not calculated<br>RCB-II: HR=3.65, CI [0.74-18.10]<br>RCB-III: HR=16.92, CI [3.59-79.66]                    | RCB-0: 1<br>RCB-I: HR= 11.75, CI [(1.21-114.30)<br>RCB-II: HR=6.54, CI [0.73-58.55]<br>RCB-III: HR=22.01, CI [(2.09-232.25]        |
| Pinard (2019)<br><i>Breast Cancer Research Treatment</i><br>(3 years RFS) | RA                                | 109                                  | 109<br>(100%)           | NA                                  | NA                      | 66.5 months                                                    | RCB-I: 91.7%<br>RCB-II: 75.4%<br>RCB-III: 37%                                                                                      | RCB-I: HR = 1<br>RCB-II: HR = 3.66 ; CI [0.84- 16.04] ; p = 0.09<br>RCB-III: HR = 14.3 ; CI [3.31-61.72] ; p = 0.0004                                                                                                           | NA                                                                  | RCB-I: 91.7%<br>RCB-II: 75.4%<br>RCB-III: 37%                        | NA                                                                                                             | RCB-I: HR = 1<br>RCB-II: HR = 3.66 ; CI [0.84- 16.04]<br>RCB-III: HR = 14.3 ; CI [3.31-61.72]                                           | NA                                                                                                                             |                                                                                                                                    |
| Our study (2019)                                                          | RA                                | 717                                  | 319<br>(44.5%)          | 176<br>(24.5%)                      | 222<br>(31%)            | 99.9 months                                                    | RCB-0: 89.9%<br>RCB-I: 89%<br>RCB-II: 67.8%<br>RCB-III: 52.7%                                                                      | RCB-0: HR = 1<br>RCB-I: HR= 1.38 ; CI [0.56-3.42 ; p= 0.48<br>RCB-II: HR = 3.05 ; CI [1.88-4.95] ; p < 0.001<br>RCB-III: HR = 5.78 ; CI [3.37-9.93] ; p < 0.001                                                                 | RCB-0: 72.7 %<br>RCB-I: 88.9 %<br>RCB-II: 69.7 %<br>RCB-III: 55.9 % | RCB-0: 85.36 %<br>RCB-I: 82.6 %<br>RCB-II: 61.8 %<br>RCB-III: 28.6 % | RCB-0: 97 %<br>RCB-I: 95.8 %<br>RCB-II: 72.5 %<br>RCB-III: 60 %                                                | RCB-0: 1<br>RCB-I: HR = 0.37 ; CI [0.06-2.23]<br>RCB-II: HR = 1.13 ; CI [0.35-3.69]<br>RCB-III: HR = 1.58 ; CI [0.49-5.14]<br>p = 0.142 | RCB-0: 1<br>RCB-I: HR= 1.23, CI [0.42-3.63]<br>RCB-II: HR=3.1, CI [1.81-5.31]<br>RCB-III: HR=9.01, CI [4.99-16.27]<br>p<0.0001 | RCB-0: 1<br>RCB-I: HR=1.52, IC [0.14-16.81]<br>RCB-II: HR=10.27, IC [2.39-44.11]<br>RCB-III: HR=16.53, IC [3.33-82.01]<br>p<0.0001 |
